# Supplementary material
Source: publisher figshare collection journal article supplement (https://tandf.figshare.com/ndownloader/files/22028589)
Supplement: Supplementary file 1 [file 22028589]

Supplementary Table 1.

Mortality and morbidity during the first year post-LT (defined as events requiring hospital admission; n=61).

| Events post-transplantation                             |           |
|---------------------------------------------------------|-----------|
| Mortality during first year after liver transplantation | 4 (7 %)   |
| Rejection episodes                                      | 24 (44 %) |
| Number of rejection episodes                            |           |
| 0                                                       | 30 (56 %) |
| 1                                                       | 20 (37 %) |
| 2                                                       | 3 (6 %)   |
| 3                                                       | 1 (2 %)   |
| Other                                                   | 30 (56 %) |

Data presented as mean (SD), median (IQR) or % as appropriate.  
LT: liver transplantation.

**Supplementary Table 2.**

**Step-wise correlation analysis** of baseline **parameters** and LT-related factors with change in hip BMD Z-score between baseline and at one-year post-LT.

| <b>BMD Z-score change left hip – crude analysis</b>    |                                                                                                                                                                    |              |
|--------------------------------------------------------|--------------------------------------------------------------------------------------------------------------------------------------------------------------------|--------------|
|                                                        | Crude correlation*<br>(r or rho)                                                                                                                                   | p-value      |
| Age                                                    | -0.10                                                                                                                                                              | 0.52         |
| BMD left hip                                           | -0.25                                                                                                                                                              | 0.09         |
| Bilirubin                                              | 0.02                                                                                                                                                               | 0.91         |
| <b><i>Nutritional status</i></b>                       |                                                                                                                                                                    |              |
| TSF                                                    | -0.11                                                                                                                                                              | 0.47         |
| MAMC                                                   | 0.13                                                                                                                                                               | 0.38         |
| BMI                                                    | 0.03                                                                                                                                                               | 0.83         |
| <b><i>Inflammation status</i></b>                      |                                                                                                                                                                    |              |
| TNF- $\alpha$                                          | <b>-0.52</b>                                                                                                                                                       | <b>0.002</b> |
| IL-6                                                   | -0.15                                                                                                                                                              | 0.42         |
| CRP                                                    | 0.04                                                                                                                                                               | 0.79         |
| <b><i>Hormonal status</i></b>                          |                                                                                                                                                                    |              |
| DHEA                                                   | 0.30                                                                                                                                                               | 0.09         |
| TSH                                                    | 0.25                                                                                                                                                               | 0.16         |
| Free T3                                                | -0.02                                                                                                                                                              | 0.90         |
| Free T4                                                | -0.02                                                                                                                                                              | 0.92         |
| Free Testosterone                                      | 0.19                                                                                                                                                               | 0.29         |
| Estradiol                                              | 0.08                                                                                                                                                               | 0.65         |
| Cortisol                                               | <b>-0.45</b>                                                                                                                                                       | <b>0.008</b> |
| Growth hormone                                         | -0.15                                                                                                                                                              | 0.33         |
| <b><i>Transplantation related factors</i></b>          |                                                                                                                                                                    |              |
| MELD-score                                             | -0.12                                                                                                                                                              | 0.41         |
| Child-Pugh score                                       | -0.13                                                                                                                                                              | 0.40         |
| Steroid dose pre-LT                                    | 0.06                                                                                                                                                               | 0.91         |
| Waiting time to LT                                     | -0.29                                                                                                                                                              | 0.052        |
| Cumulative steroid dose post-LT                        | -0.23                                                                                                                                                              | 0.15         |
| <b>BMD Z-score change left hip – adjusted analysis</b> |                                                                                                                                                                    |              |
|                                                        | Pearsson's partial correlation coefficient<br>(r) adjusted for age, sex, MELD-score<br>and cholestatic etiology, bisphosphonate<br>treatment and morbidity post-LT | p-value      |
| <b>TNF-<math>\alpha</math></b>                         | <b>-0.47</b>                                                                                                                                                       | <b>0.012</b> |
| <b>Cortisol</b>                                        | <b>-0.49</b>                                                                                                                                                       | <b>0.008</b> |

BMD, bone mineral density; DHEA, dehydroepiandrosterone; TSH, thyroid stimulating hormone; T3, free Triiodothyronine; T4, free Thyroxine; TSF, triceps skin fold thickness; MAMC, mid arm muscular circumference; BMI, body mass index; LT, liver transplantation.

1  
2  
3  
4  
5  
6  
7  
8  
9  
10  
11  
12  
13  
14  
15  
16  
17  
18  
19  
20  
21  
22  
23  
24  
25  
26  
27  
28  
29  
30  
31  
32  
33  
34  
35  
36  
37  
38  
39  
40  
41  
42  
43  
44  
45  
46  
47  
48  
49  
50  
51  
52  
53  
54  
55  
56  
57  
58  
59  
60

\*In the crude analysis, when the association between low bone mass (osteopenia or osteoporosis) and hormones DHEA, free testosterone and estradiol was tested, sex was included as a covariate. Those hormones, inflammatory markers and markers of nutritional status, which were statistically significantly associated with hip BMD Z-score change in the crude analysis were included in a Pearson’s partial correlation analysis with the pre-defined covariables age, sex, MELD- score and bisphosphonate treatment. Cholestatic etiology and morbidity post-LT were also included in this model because they were significantly associated with hip BMD Z-score change in the crude analyses. Significant results ( $p<0.05$ ) are indicated in bold

For Peer Review Only
